# Supplementary material for: Degradation of methyl orange by dielectric films based on contact-electro-catalysis
Source: Royal Society of Chemistry journal article supplement (doi:10.1039/d2nr06783h), 2023-01-01
Supplement: d2nr06783h1.pdf [file d2nr06783h1.pdf]

## Supporting Information

### Degradation of Methyl Orange by dielectric films based on contact-electro-catalysis

*Xin Zhao<sup>†,‡</sup>, Yusen Su<sup>†,‡,‡</sup>, Andy Berbille<sup>†,‡</sup>, Zhong Lin Wang<sup>†,‡,§,\*</sup>, and Wei Tang<sup>†,‡,\*</sup>*

<sup>†</sup> CAS Center for Excellence in Nanoscience, Beijing Institute of Nanoenergy and Nanosystems, Chinese Academy of Sciences, Beijing, 100083, China.

<sup>‡</sup> School of Nanoscience and Technology, University of Chinese Academy of Sciences, Beijing, 100049, China.

<sup>§</sup> Georgia Institute of Technology, Atlanta, GA 30332-0245, USA.

<sup>‡</sup>X.Z. and Y.S. contributed equally to this work.

\*E-mail: tangwei@binn.cas.cn. (W.T.) zhong.wang@mse.gatech.edu. (Z.L.W.)

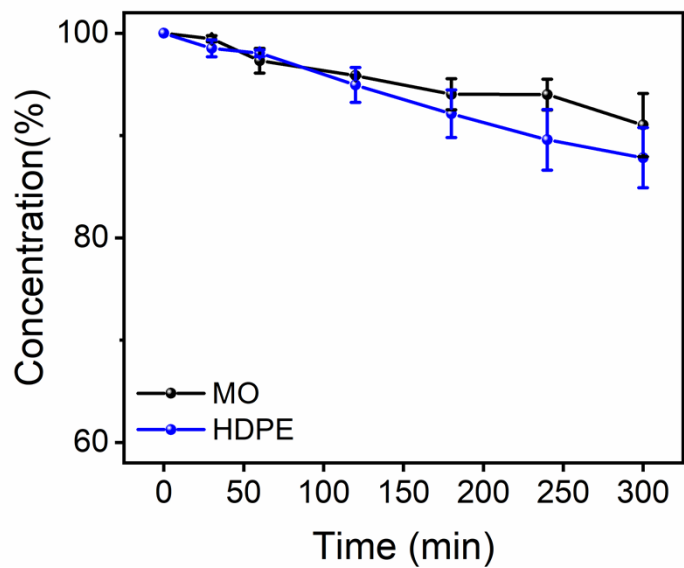

**Figure S1.** Degradation of methyl orange with/without HDPE film for 5 hours. Error bars represent standard deviation based on three replicate data.

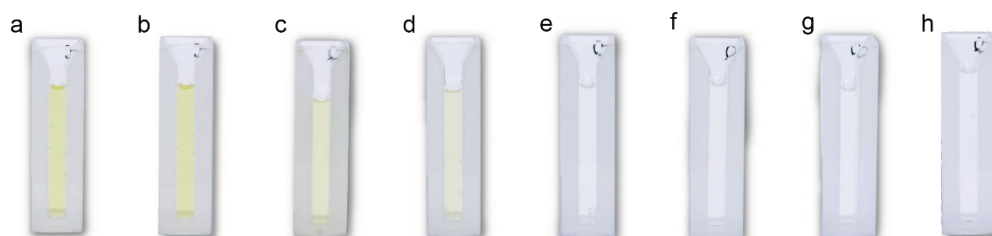

**Figure S2.** Comparison of absorbance of MO solution with/without etched FEP film in **a**, 0 min, **b**, 30 min **c**, 60 min **d**, 120 min, **e**, 180 min, **f**, 240 min, **g**, 300min, **h**, 600 min ultrasonication.

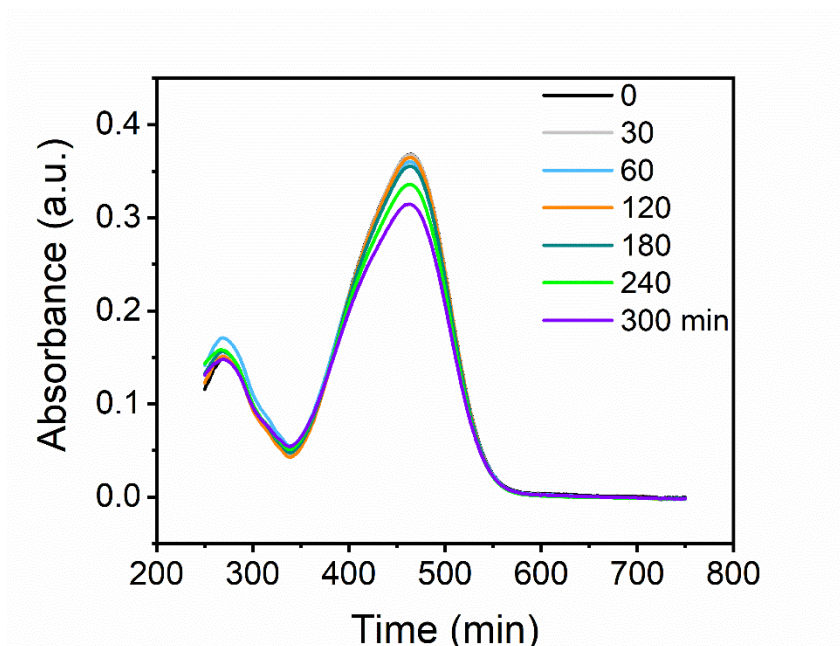

**Figure S3.** UV-Vis spectra of a 50 mL MO solution during ultrasonication with none.

| m/z                         | 173                                                                                 | 218                                                                                 | 276                                                                                 | 290                                                                                  | 306                                                                                   | 320                                                                                   |
|-----------------------------|-------------------------------------------------------------------------------------|-------------------------------------------------------------------------------------|-------------------------------------------------------------------------------------|--------------------------------------------------------------------------------------|---------------------------------------------------------------------------------------|---------------------------------------------------------------------------------------|
| <b>Degradation Products</b> | 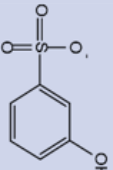 |  |  |  |  |  |

**Figure S4.** The chemical structure of the product during the CEC degradation of methyl orange as identified by mass-spectroscopy.

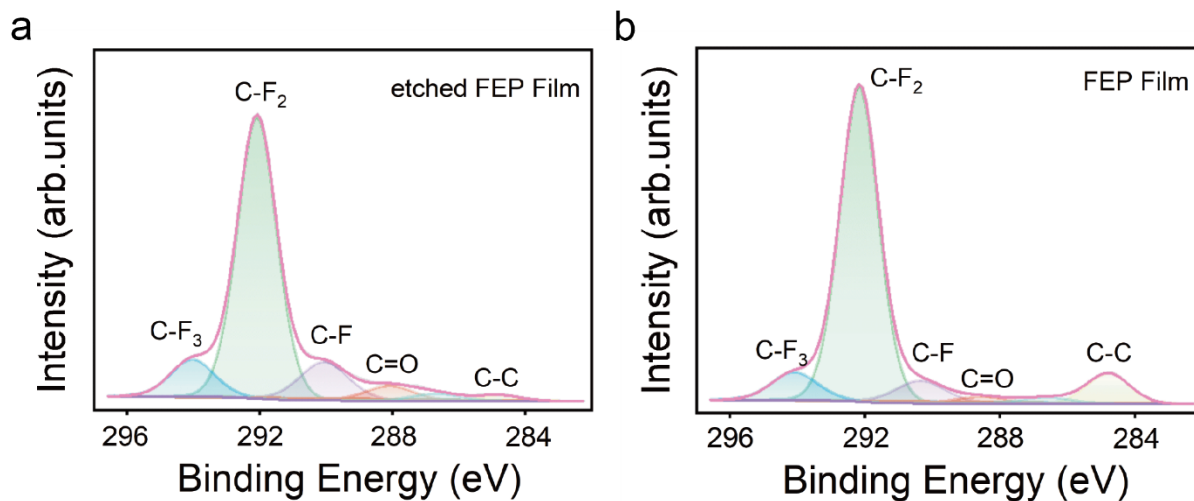

**Figure S5.** C1s, F1s and O1s XPS spectra of FEP film **a**, before and **b**, after plasma etching with Ar gas.

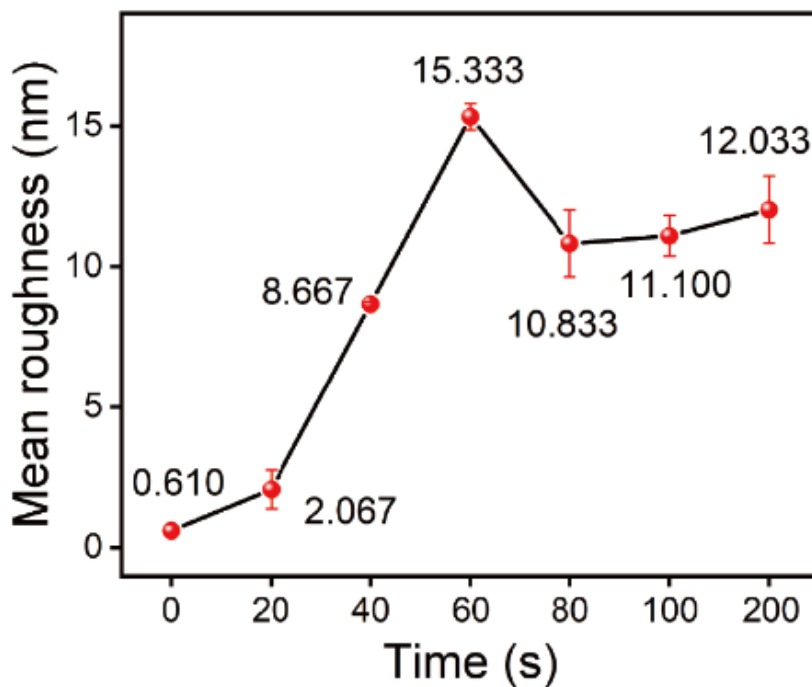

**Figure S6.** Surface roughness of FEP film at different etching time. Error bars represent standard deviation based on three replicate data.

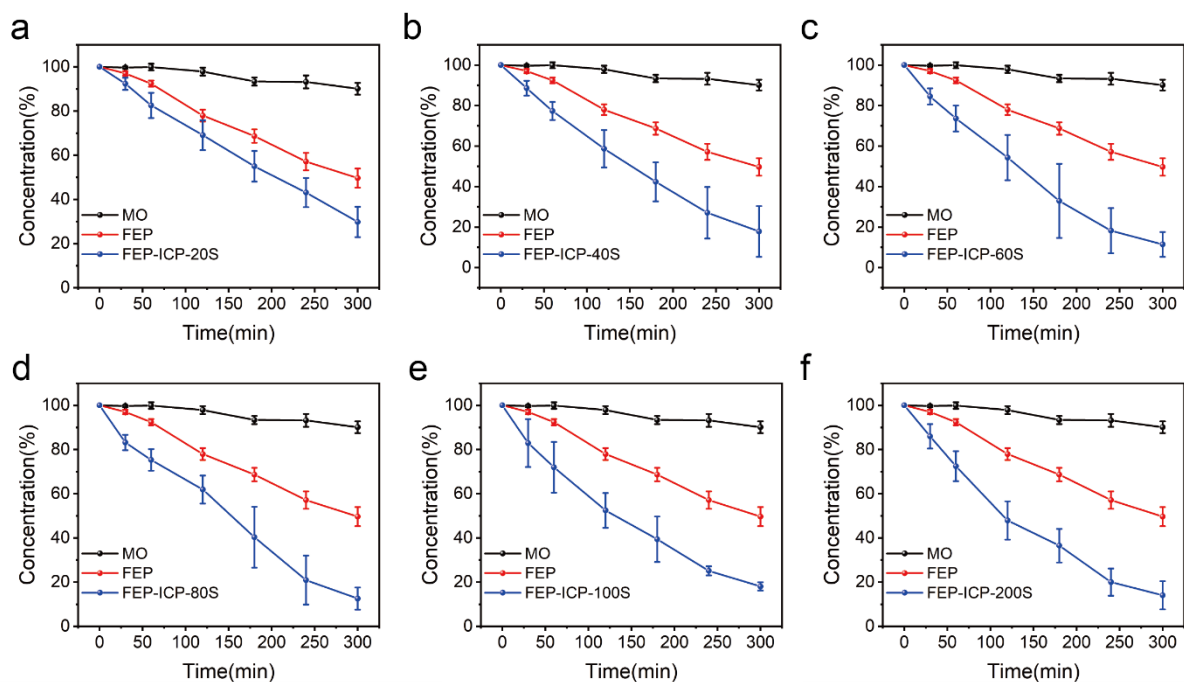

**Figure S7.** Degradation of methyl orange with **a**, 20 s **b**, 40 s **c**, 60 s **d**, 80 s **e**, 100 s **f**, 200 s etched film during ultrasonication. Error bars represent standard deviation based on three replicate data.

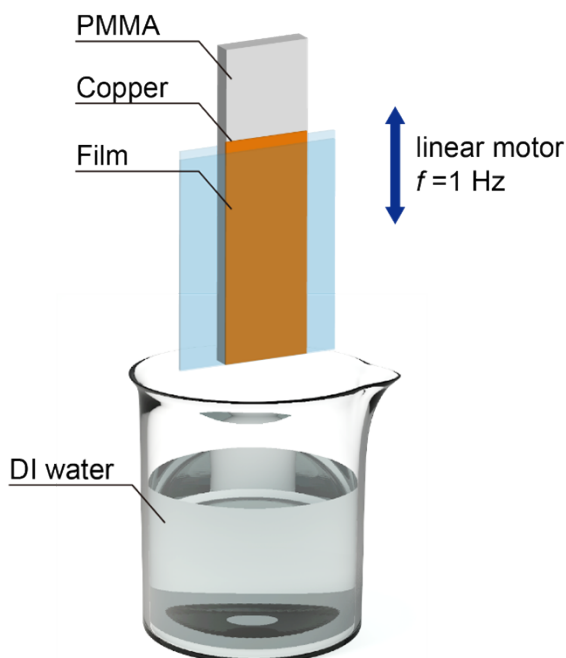

**Figure S8.** Demonstration of measuring the transferred charge of a SE-TENG which is repeatedly immersed in DI water.

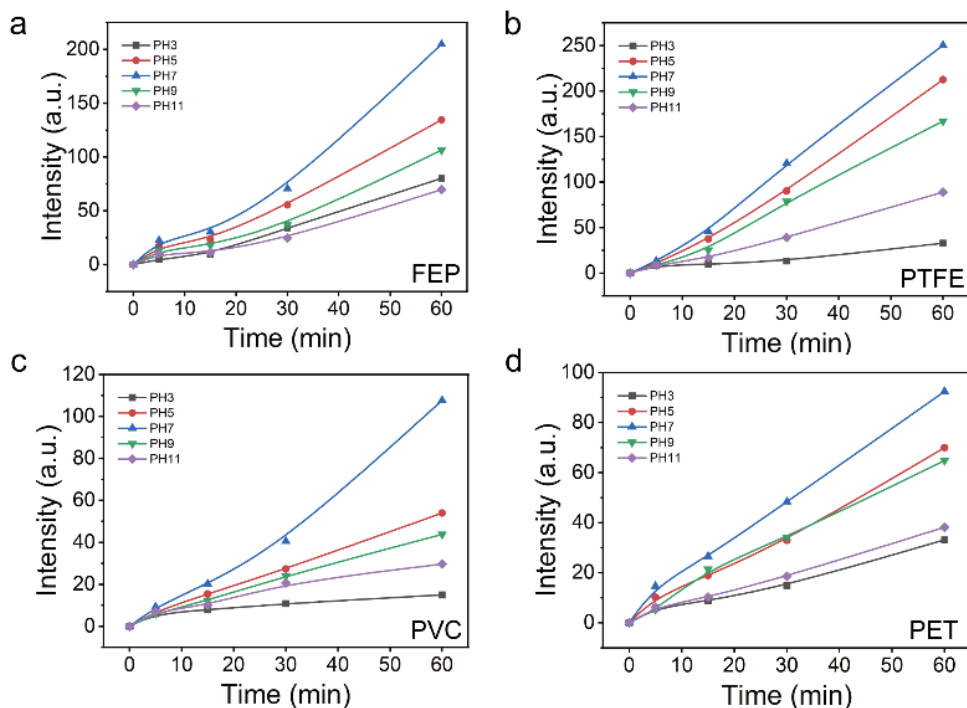

**Figure S9.** THA-OH intensity reacted in various PH with FEP (a), PTFE (b), PVC (c), and PET (d) etched films.

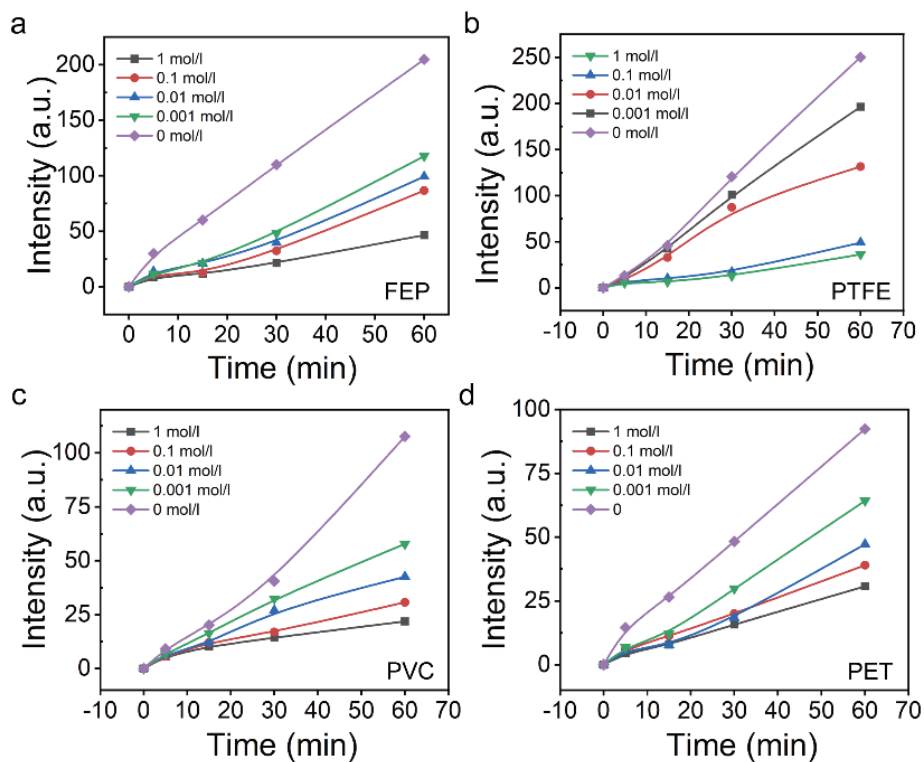

**Figure S10.** THA-OH intensity reacted in various NaCl concentration with FEP (a), PTFE (b), PVC (c), and PET (d) etched films.

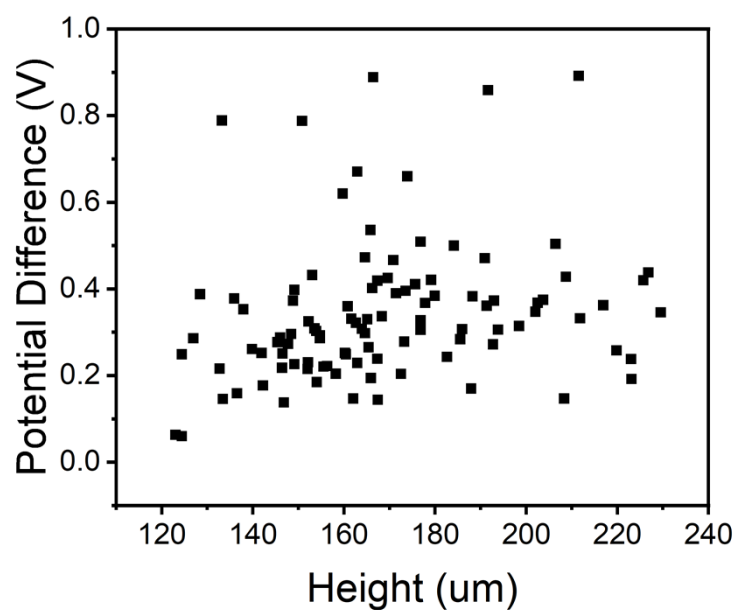

**Figure S11.** One hundred measurements of potential difference depend on height between peak and bottom of structure.

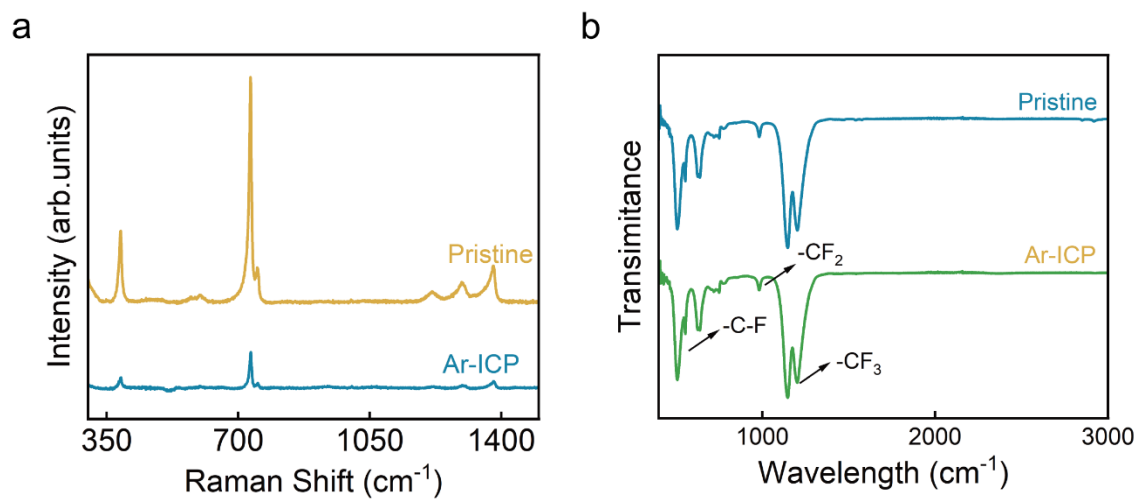

**Figure S12.** Raman (a) and ATR-FTIR spectra (b) for pristine and 60 seconds Ar-ICP etched FEP films.

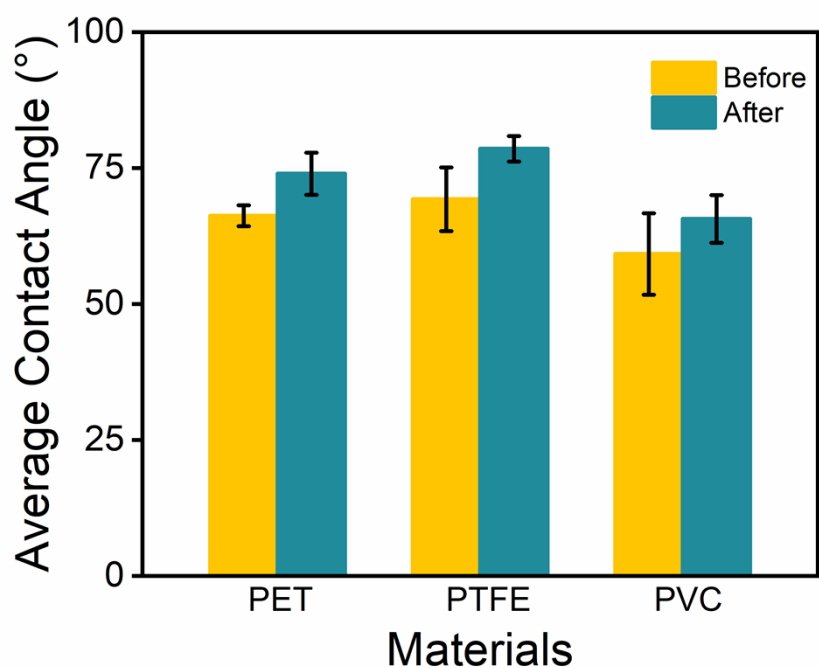

**Figure S13.** Contact angle of PET, PTFE, and PVC film before and after etching. Error bars represent standard deviation based on three replicate data.

| Cycle Number | Discoloration 5 Hours | Kinectic Rate ( $H^{-1}$ ) |
|--------------|-----------------------|----------------------------|
| 1st cycle    | 81.94                 | 0.00561                    |
| 2nd cycle    | 49.90                 | 0.00227                    |
| 3rd cycle    | 36.60                 | 0.00138                    |
| 4th cycle    | 36.90                 | 0.00151                    |
| 5th cycle    | 33.77                 | 0.00143                    |

**Figure S14.** Evolution of degradation from 1 to 5 cycles of reaction.



| <b>Height (um)</b> | <b>Voltage (V)</b> | <b>Height (um)</b> | <b>Voltage (V)</b> |
|--------------------|--------------------|--------------------|--------------------|
| 123                | 0.063              | 160.8              | 0.36               |
| 124.4              | 0.249              | 161.6              | 0.3312             |
| 124.4              | 0.06               | 162                | 0.147              |
| 126.9              | 0.286              | 162.6              | 0.322              |
| 128.4              | 0.388              | 162.9              | 0.671              |
| 132.7              | 0.216              | 162.9              | 0.2291             |
| 133.2              | 0.789              | 163.9              | 0.308              |
| 133.4              | 0.146              | 164.6              | 0.298              |
| 135.9              | 0.378              | 164.6              | 0.473              |
| 136.5              | 0.159              | 165.1              | 0.33               |
| 137.9              | 0.353              | 165.4              | 0.2652             |
| 139.8              | 0.2612             | 165.8              | 0.536              |
| 141.9              | 0.2522             | 165.9              | 0.1942             |
| 142.2              | 0.177              | 166.2              | 0.402              |
| 145.4              | 0.277              | 166.4              | 0.889              |
| 146                | 0.2878             | 167.3              | 0.2387             |
| 146.4              | 0.218              | 167.3              | 0.419              |
| 146.5              | 0.251              | 167.4              | 0.144              |
| 146.8              | 0.138              | 168.3              | 0.3369             |
| 147.7              | 0.273              | 169.6              | 0.4251             |
| 148.4              | 0.296              | 170.8              | 0.4666             |
| 148.8              | 0.373              | 171.4              | 0.39               |
| 149.1              | 0.2263             | 172.5              | 0.204              |
| 149.1              | 0.398              | 173.2              | 0.2783             |
| 150.8              | 0.788              | 173.5              | 0.3957             |
| 152                | 0.215              | 173.9              | 0.66               |
| 152.1              | 0.2306             | 175.6              | 0.411              |
| 152.2              | 0.3251             | 176.8              | 0.3274             |
| 153                | 0.432              | 176.8              | 0.3056             |
| 153.5              | 0.3088             | 176.8              | 0.509              |
| 153.9              | 0.3028             | 177.8              | 0.3675             |

|       |        |       |        |
|-------|--------|-------|--------|
| 154   | 0.185  | 179.1 | 0.421  |
| 154.7 | 0.2864 | 179.9 | 0.384  |
| 154.7 | 0.2926 | 182.6 | 0.243  |
| 155.5 | 0.2207 | 184.1 | 0.5    |
| 156.3 | 0.222  | 185.5 | 0.2838 |
| 158.2 | 0.2043 | 185.9 | 0.3073 |
| 159.7 | 0.62   | 187.9 | 0.17   |
| 160.2 | 0.2521 | 188.2 | 0.383  |
| 160.4 | 0.249  | 190.9 | 0.471  |
| 191.3 | 0.361  | 208.3 | 0.147  |
| 191.6 | 0.859  | 208.7 | 0.428  |
| 192.7 | 0.272  | 211.5 | 0.892  |
| 192.9 | 0.373  | 211.8 | 0.332  |
| 193.8 | 0.306  | 216.9 | 0.3624 |
| 198.4 | 0.3145 | 219.8 | 0.258  |
| 202   | 0.3473 | 223   | 0.238  |
| 202.5 | 0.368  | 223.1 | 0.192  |
| 203.7 | 0.3748 | 225.7 | 0.42   |
| 206.4 | 0.504  | 226.8 | 0.438  |

**Table S1** Summary of Potential difference depend on height between peak and bottom. All measurements were randomly selected in four different films.
